# Supplementary material for: Inhibition of Hepatitis B Virus (HBV) by Tachyplesin, a Marine Antimicrobial Cell-Penetrating Peptide
Source: MDPI journal article supplement (doi:10.3390/pharmaceutics15020672), 2023-02-16
Supplement: s1 [file s1]

## Supplementary Information

### Inhibition of Hepatitis B Virus (HBV) by Tachyplesin, a Marine Antimicrobial Cell-Penetrating Peptide

Pankhuri Narula, Sankar Kiruthika, Shruti Chowdhari, Perumal Vivekanandan \* and Archana Chugh \*

Kusuma School of Biological Sciences, Indian Institute of Technology, Hauz Khas, New Delhi 110016, India;

\* Correspondence: Dr. Archana Chugh (achugh@bioschool.iitd.ac.in) and

Dr. Vivekanandan Perumal (vperumal@bioschool.iitd.ac.in)

Figure S1

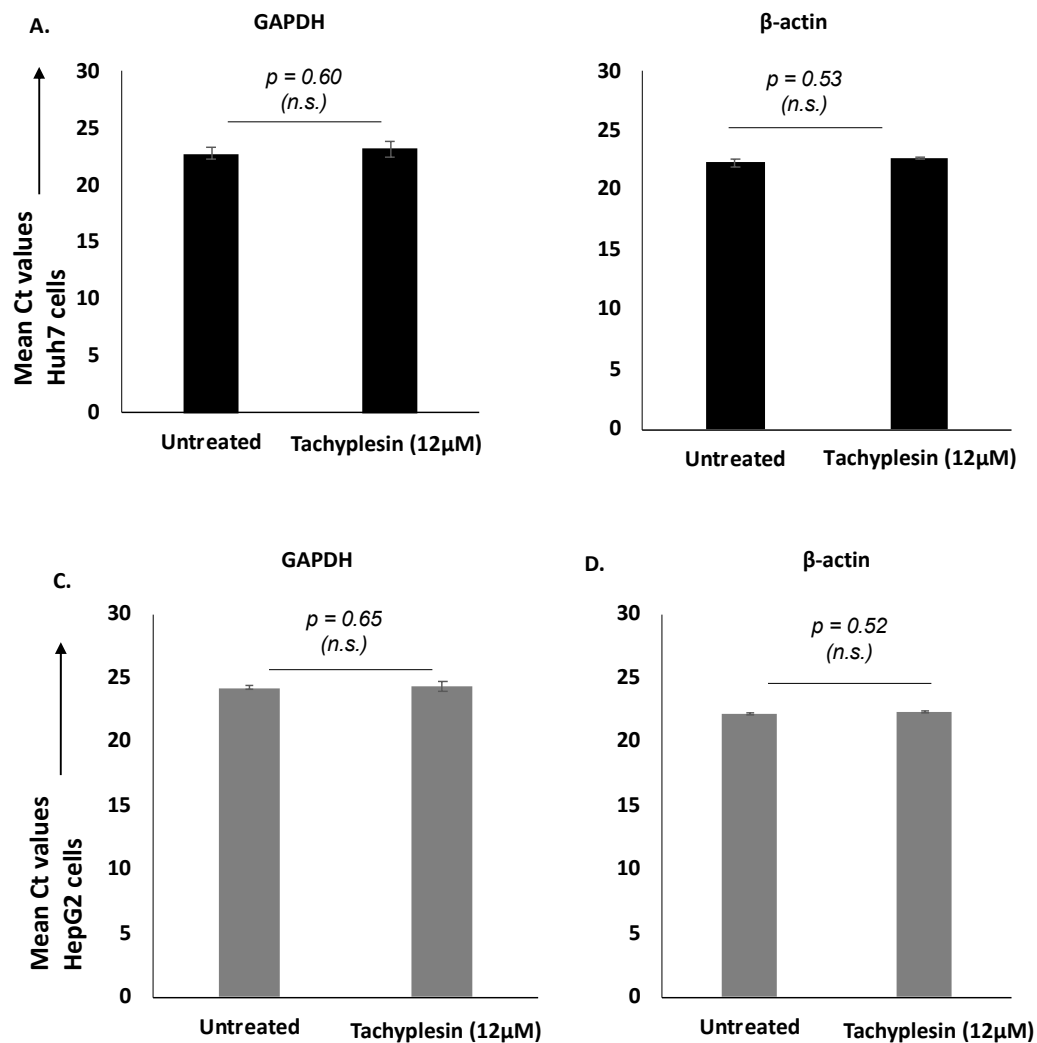

**Figure S1: Effect of Tpl on GAPDH and  $\beta$ -actin genes in both the cell lines.** The bar graphs represent mean of Ct values from qRT-PCR assays for housekeeping genes: GAPDH and  $\beta$ -actin in Huh7 and HepG2 cell lines treated with or without Tpl. The error bars represent standard deviation (n=3).

**Figure S2**

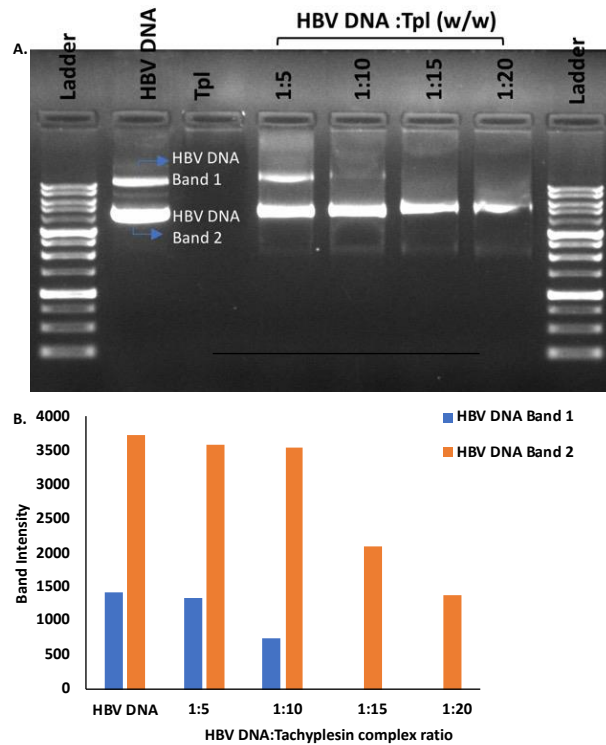

**Figure S2: Complexation of HBV DNA:Tpl.** HBV DNA:Tpl were mixed at different w/w ratios and were then analysed for complexation by gel retardation assay. The band intensity was also quantified using Image lab 6.1 software.

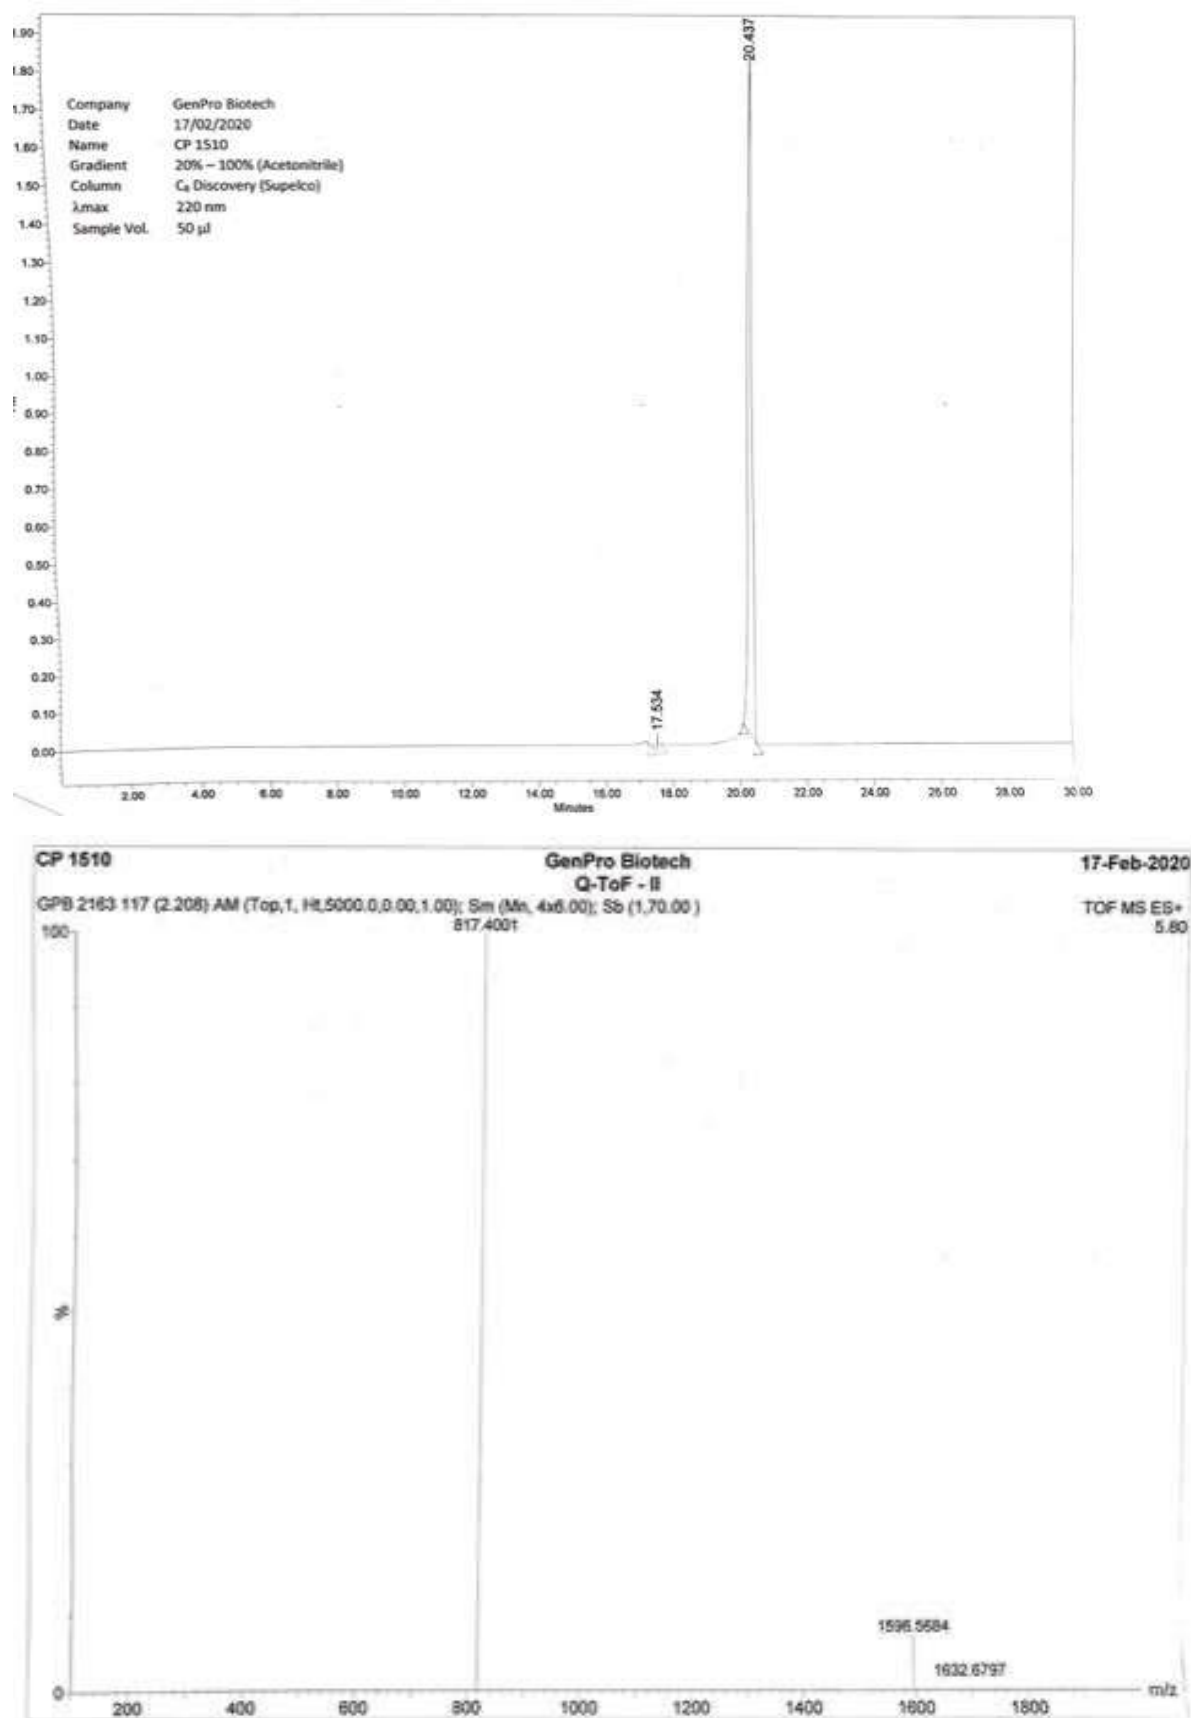

**Figure S3: MS/HPLC data of Tachyplesin.** The expected mass of Tpl was 2449.09 Daltons and the observed mass was found to be 2449.2 ( $M+3H^+ = 817.4$ ) respectively.
